# Supplementary material for: A novel, shape-selective, zeolite-catalyzed synthesis of calix(4)pyrroles.
Source: Royal Society of Chemistry journal article supplement (doi:10.1039/b105690p), 2001-10-15
Supplement: tabs1b105690p.doc [file tabs1b105690p.doc]

**Table S1** Results at the end of the one million Monte Carlo simulations involving sorption of sorbents **1a**, **1b**, **1c** and **1d** in mesoporous material Al-MCM-41 and zeolite HY at temperature: 333 K.

| Sorbate molecule | Al-MCM-41 | | HY | |
| --- | --- | --- | --- | --- |
| Average loading | Average energy  (Kcal/mole) | Average loading | Average energy  (Kcal/mole) |
| Cyclic molecule (**1a)** | 4.1 | -42.1 | 0.0 | 0.0 |
| Linear tetramer **(1d)** | 4.8 | -38.68 | 0.0 | 0.0 |
| Linear trimer **(1c)** | 12.5 | -28.1 | 0.0 | 0.0 |
| Linear dimer **(1b)** | 48.3 | -31.2 | 10.0 | -19.4 |
